# Supplementary material
Source: PubMed Central journal article supplement (PMC7688486)
Supplement: NIHMS1600952-supplement-9.pdf [file NIHMS1600952-supplement-9.pdf]

| <b>Cell Line</b> | <b>CREBBP status</b> | <b>CREBBP mutation type</b>                                  | <b>Domain Effected</b>                              | <b>COSMIC verified</b> | <b>CCLC verified</b> |
|------------------|----------------------|--------------------------------------------------------------|-----------------------------------------------------|------------------------|----------------------|
| <b>U2932</b>     | WT                   | N/A                                                          | N/A                                                 | Yes                    | No                   |
| <b>Pfeiffer</b>  | Mutant               | Missense Substitution (Q1491K - Heterozygous)                | KAT domain                                          | Yes                    | Yes                  |
| <b>SU-DHL6</b>   | Mutant               | Frameshift Deletion (L470fs - Heterozygous)                  | KIX/BROMO/PHD/KAT/ZZ/CH3 domains                    | Yes                    | Yes                  |
| <b>Toledo</b>    | Mutant               | In-frame deletion (S1680del - Heterozygous)                  | unknown (between KAT and ZZ domains)                | No                     | Yes                  |
| <b>SU-DHL2</b>   | WT                   | N/A                                                          | N/A                                                 | Yes                    | No                   |
| <b>SU-DHL16</b>  | Mutant               | In-frame deletion (S1680del), Missense substitution (Y1450C) | unknown (between KAT and ZZ domains) and KAT domain | Yes                    | Yes                  |

| Cell Line | EP300 status | EP300 mutation type                           | Domain Effected                      | COSMIC verified | CCL4 verified |
|-----------|--------------|-----------------------------------------------|--------------------------------------|-----------------|---------------|
| U2932     | WT           | N/A                                           | N/A                                  | Yes             | No            |
| Pfeiffer  | WT           | N/A                                           | N/A                                  | No              | No            |
| SU-DHL6   | Mutant       | Missense Substitution (R1627W - Heterozygous) | unknown (between KAT and ZZ domains) | Yes             | Yes           |
| Toledo    | Mutant       | Missense Substitution (L1520V - Heterozygous) | KAT domain                           | No              | Yes           |
| SU-DHL2   | Mutant       | Nonsense Substitution (Q821stop) - Homozygous | BROMO/PHD/KAT/ZZ/CH3 domains         | Yes             | No            |
| SU-DHL16  | Mutant       | Conservative non-synonymous substitution      | unknown                              | No              | No            |

**Cell Line****Published Literature**

---

|                 |                                                                                                                            |
|-----------------|----------------------------------------------------------------------------------------------------------------------------|
| <b>U2932</b>    | Pasqualucci Nature 2011 (ref 9 - doi: 10.1038/nature09730)                                                                 |
| <b>Pfeiffer</b> | Zhang 2013 PNAS (ref 11 - doi: 10.1073/pnas.1205299110), Haery Mol Cancer 2014 (ref 45 - doi: 10.1186/1476-4598-13-29)     |
| <b>SU-DHL6</b>  | Pasqualucci Nature 2011 (ref 9 - doi: 10.1038/nature09730)                                                                 |
| <b>Toledo</b>   | Andersen Leuk Res Rep 2012 (ref 43 - doi: 10.1016/j.lrr.2012.10.002)                                                       |
| <b>SU-DHL2</b>  | Pasqualucci Nature 2011 ( ref 9 - doi: 10.1038/nature09730), Haery Mol Cancer 2014 (ref 45 - doi: 10.1186/1476-4598-13-29) |
| <b>SU-DHL16</b> | Hashwah PNAS 2017 (ref 44 - doi: 10.1073/pnas.1619555114)                                                                  |
