# Supplementary material
Source: PubMed Central journal article supplement (PMC7688486)

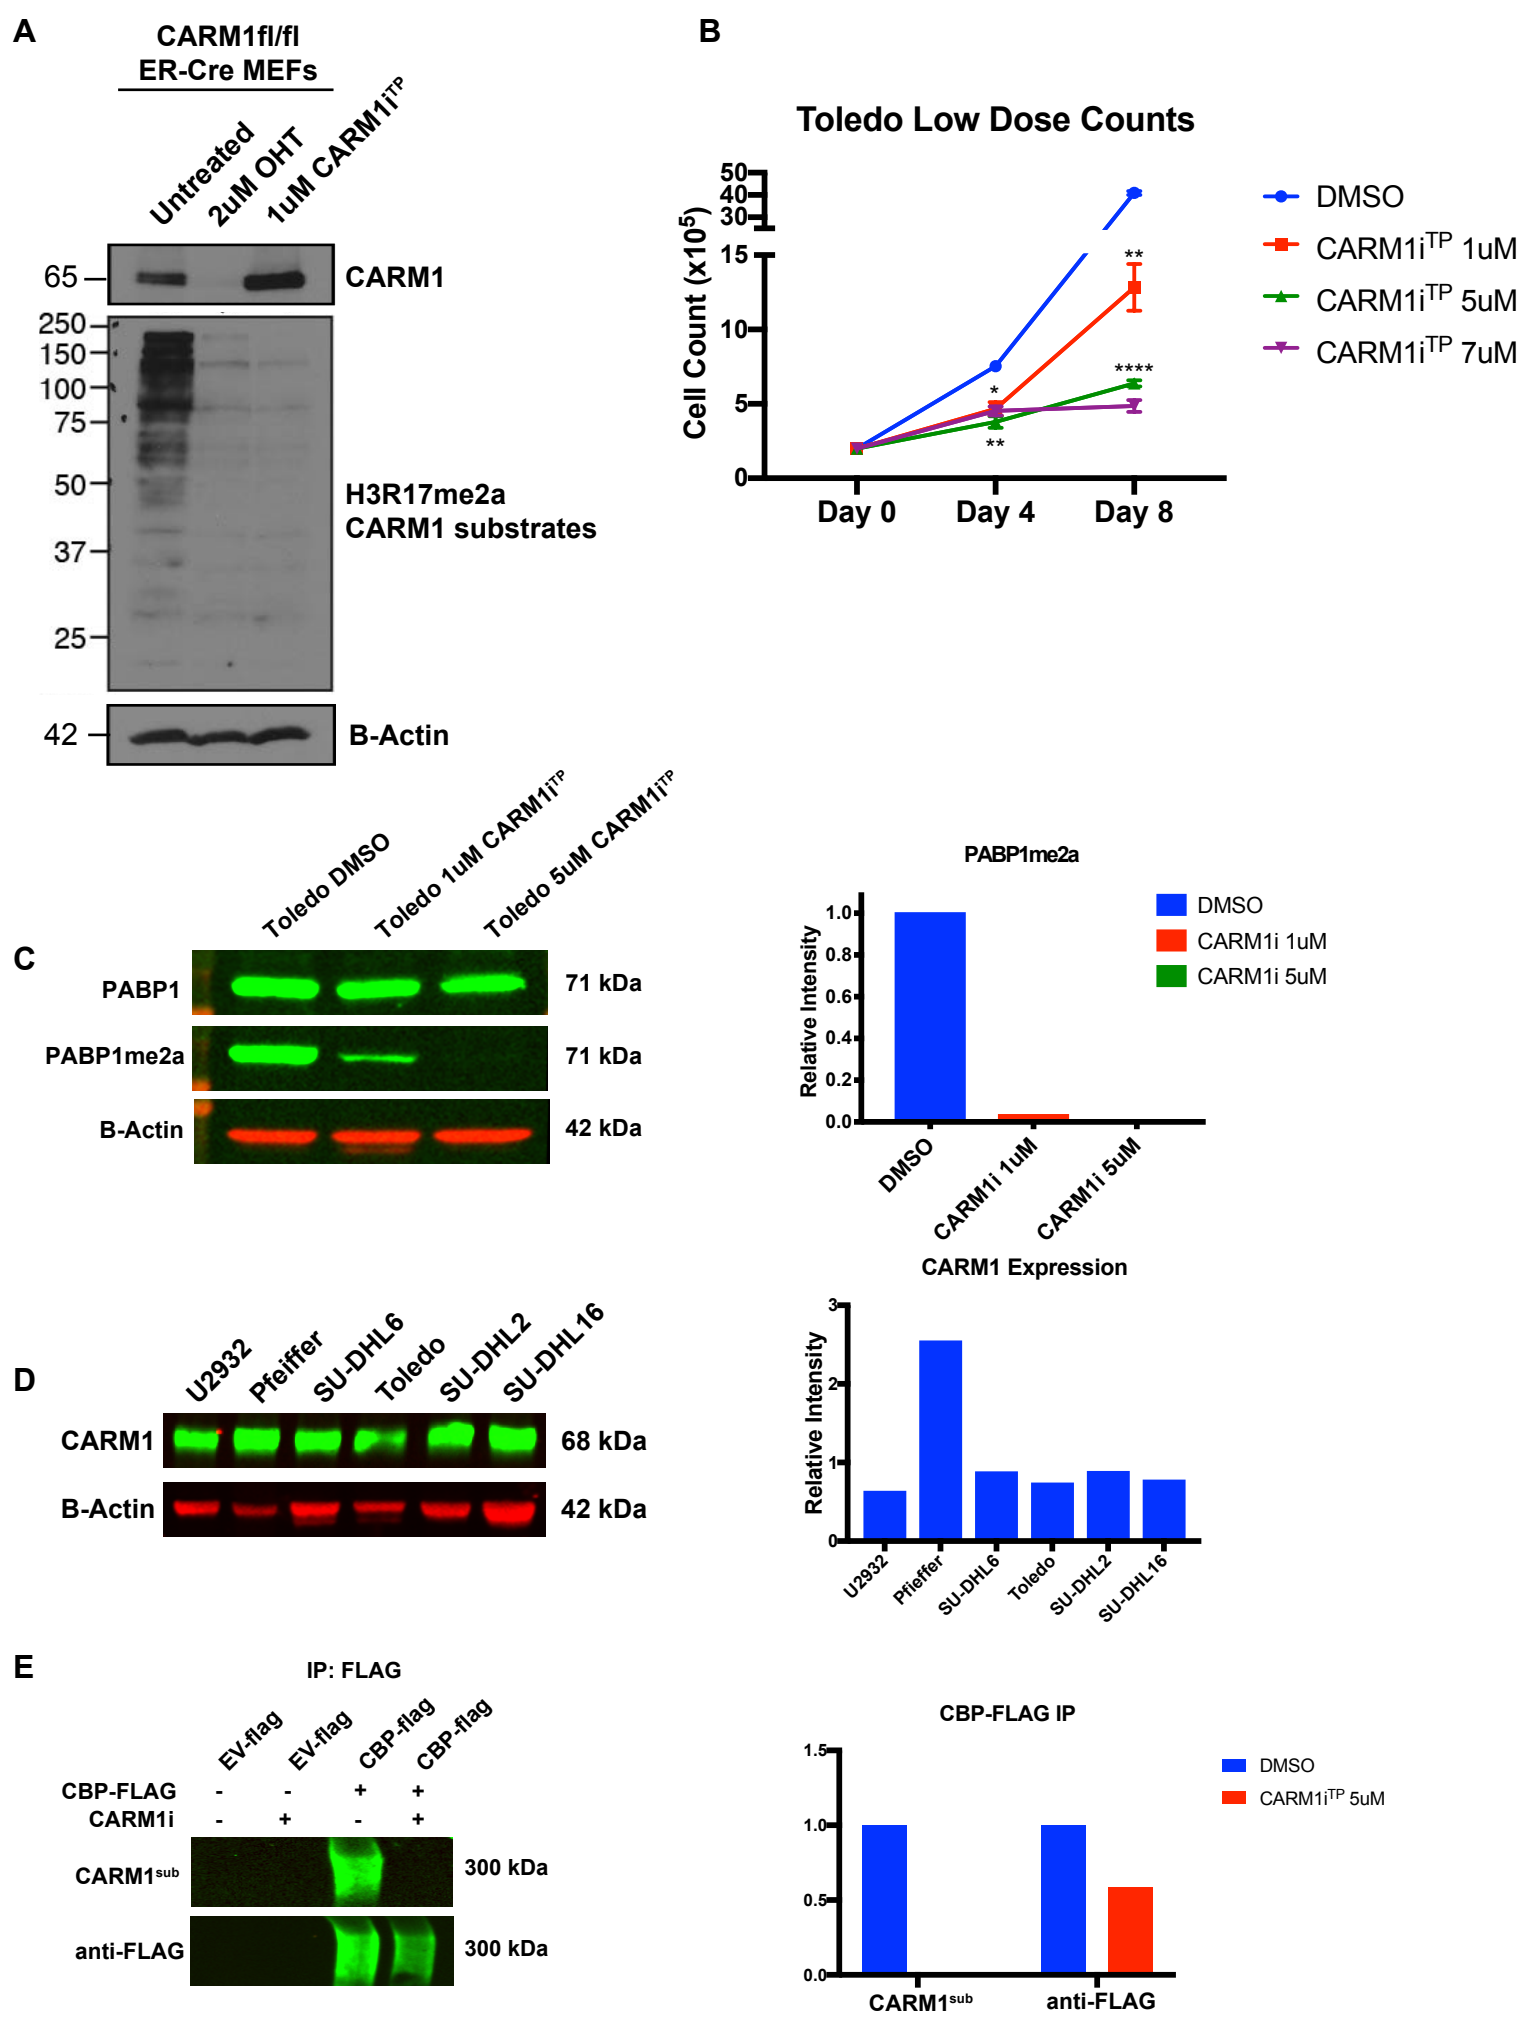

Supplement: NIHMS1600952-supplement-1.pdf [file NIHMS1600952-supplement-1.pdf]

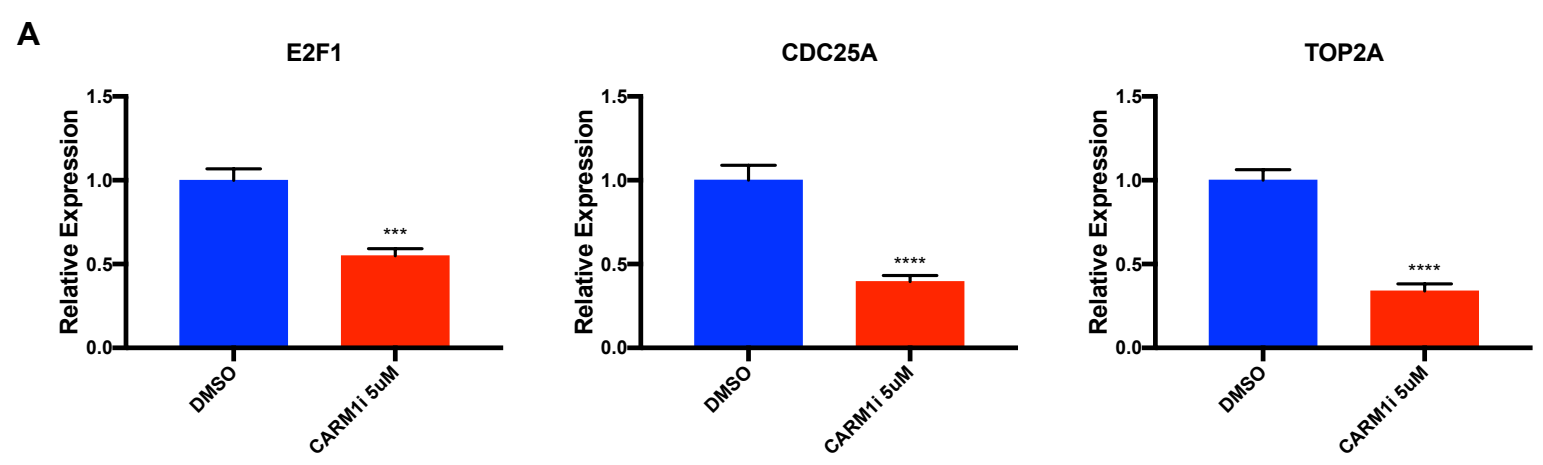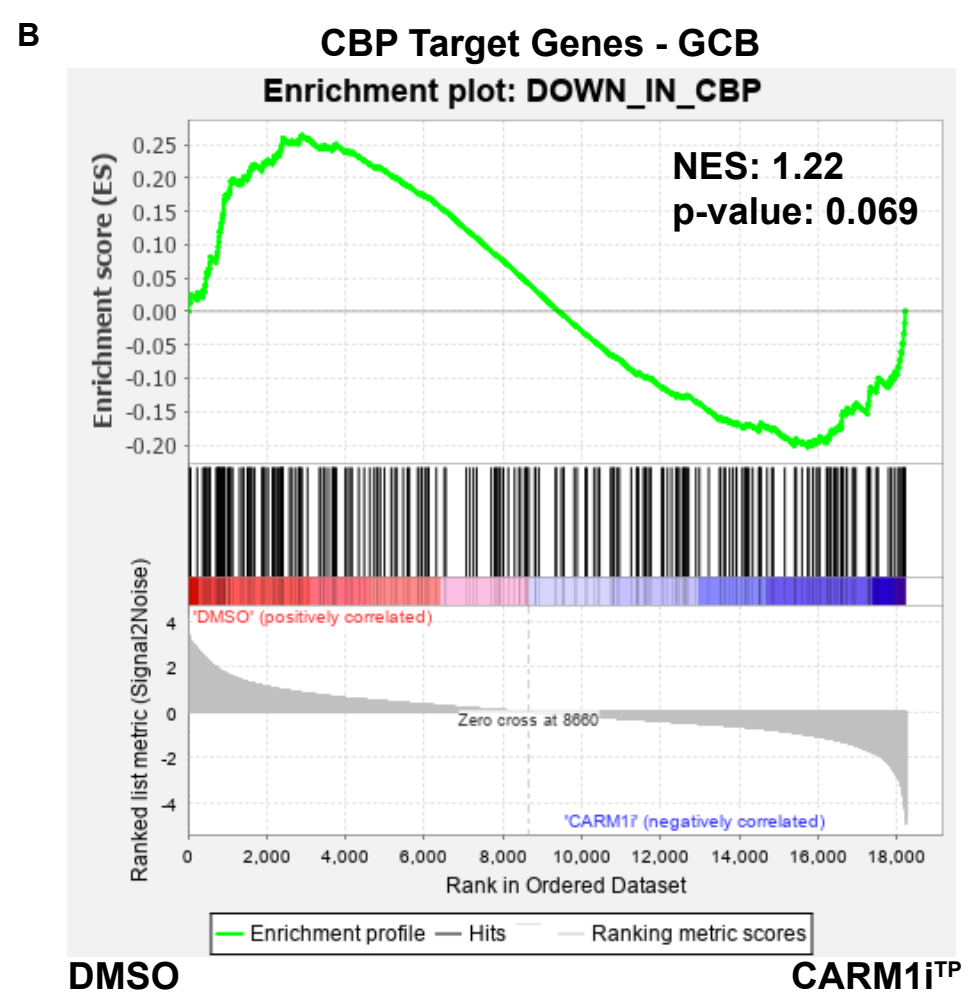

Supplement: NIHMS1600952-supplement-2.pdf [file NIHMS1600952-supplement-2.pdf]

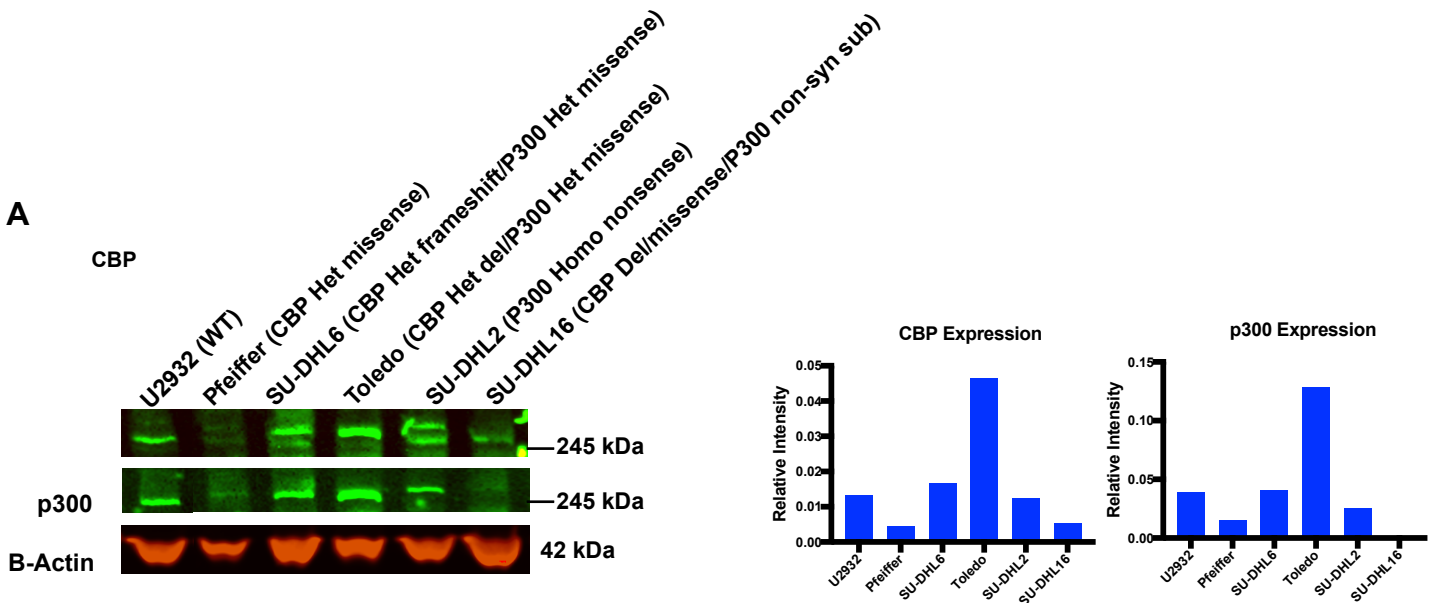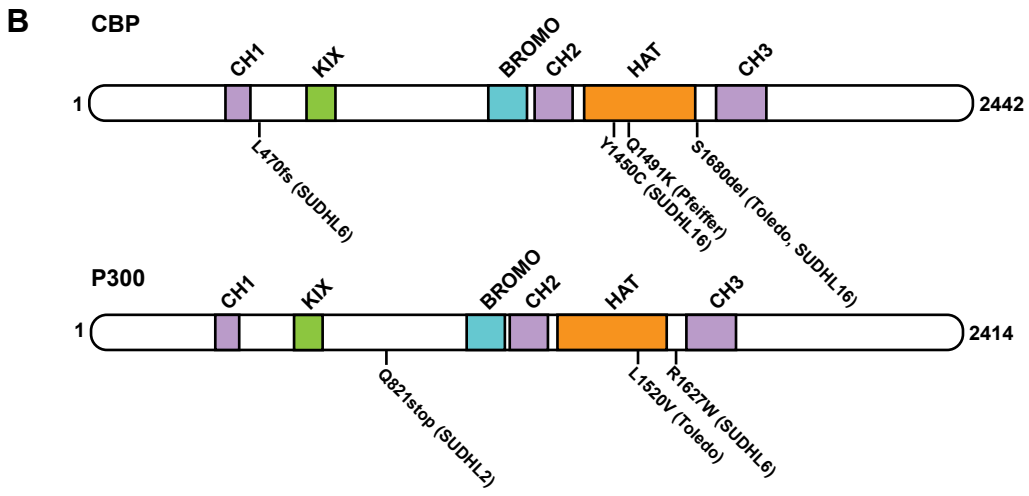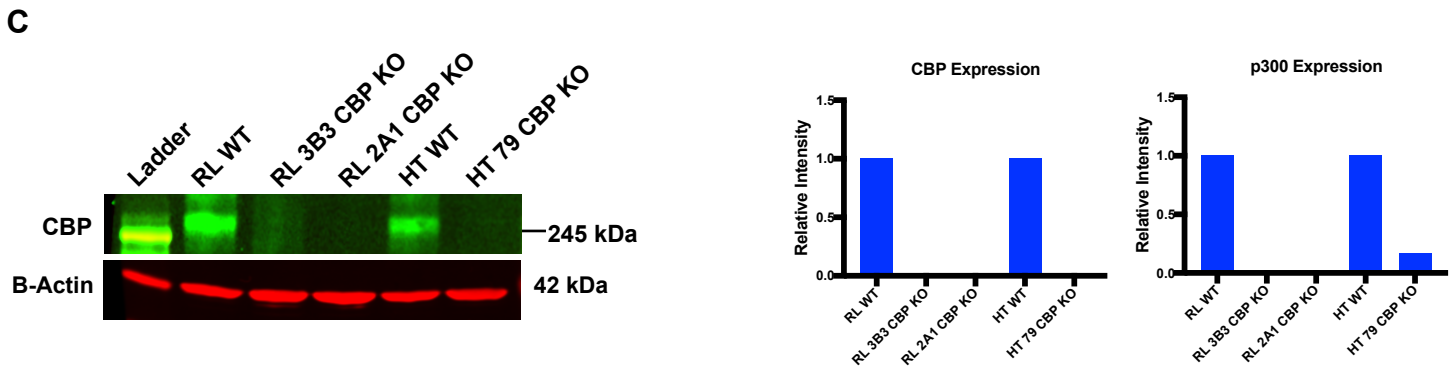

Supplement: NIHMS1600952-supplement-3.pdf [file NIHMS1600952-supplement-3.pdf]

**A**

**Toledo Xenograft Tumors**

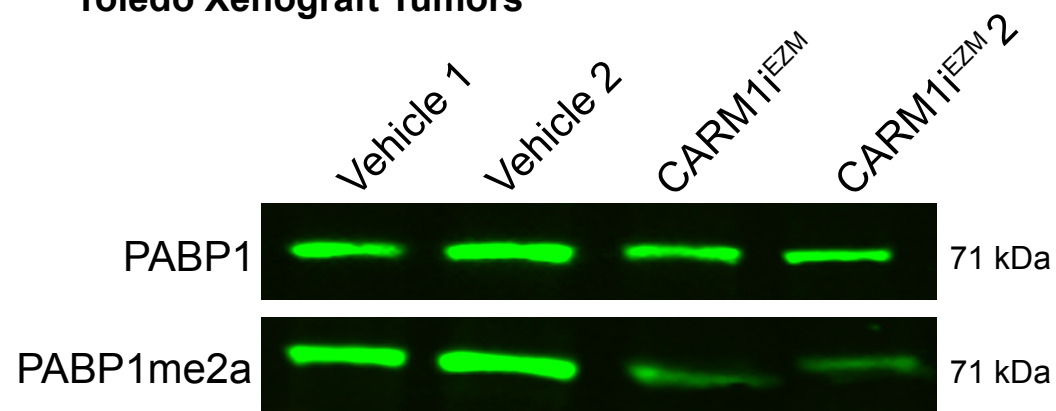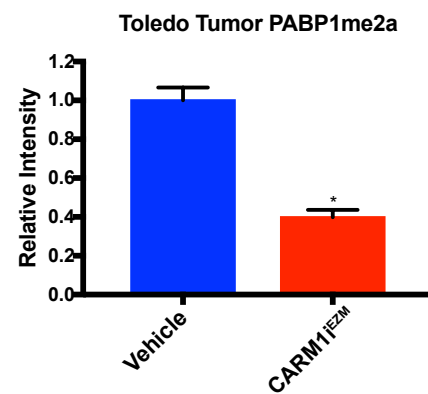

**B**

**U2932 Xenograft Tumors**

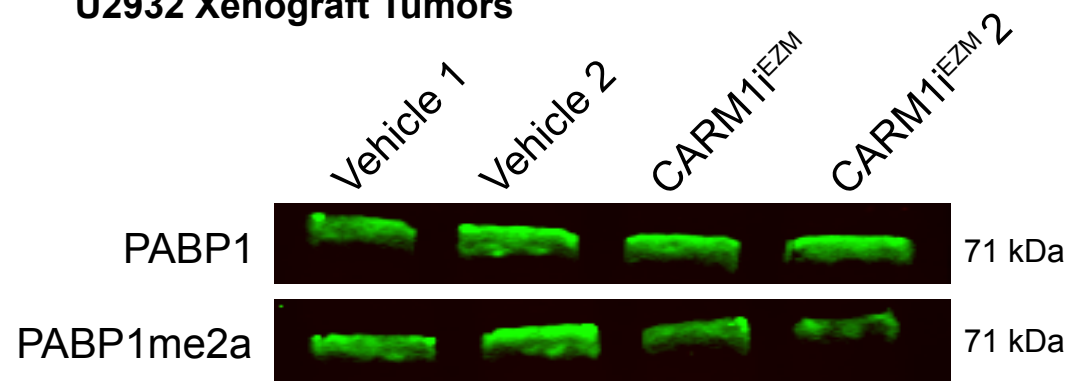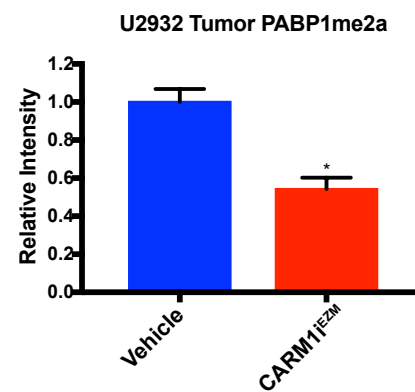

Supplement: NIHMS1600952-supplement-4.pdf [file NIHMS1600952-supplement-4.pdf]
